# Supplementary material for: Frailty as a Predictor of Poor Rehabilitation Outcomes among Older Patients Attending a Geriatric Day Hospital Program: An Observational Study
Source: MDPI journal article supplement (doi:10.3390/ijerph19106276), 2022-05-21
Supplement: s1 [file s1]

# **Supplementary information**

**For the article entitled:**

**Frailty as a predictor of poor rehabilitation outcomes among older patients attending a geriatric day hospital program: an observational study**

**Authors:**

Daniel Andres, Caroline Imhoof, Markus Bürge, Gabi Jakob, Andreas Limacher and Anna K. Stuck

**April 29, 2022**

**Table S1. (A)** Sensitivity analyses: Clinical characteristics by serious adverse events in patients aged 75 and older (n=391). **(B).** Sensitivity analyses: Clinical characteristics by admission to permanent nursing home care in patients aged 75 and older (n=391).

| <b>A. Sensitivity analyses: Clinical characteristics by serious adverse events in patients aged 75 and older (n=391)</b>                   |                                    |                                                 |                                |         |                                 |         |
|--------------------------------------------------------------------------------------------------------------------------------------------|------------------------------------|-------------------------------------------------|--------------------------------|---------|---------------------------------|---------|
|                                                                                                                                            | Regular completion of GDH (n=422)  | Serious adverse event (n=77)                    | Unadjusted odds ratio (95% CI) | p-value | Adjusted odds ratio (95% CI) a) | p-value |
| Age, mean (sd) <sup>a)</sup>                                                                                                               | 83.0 (4.9)                         | 83.2 (5.0)                                      | 1.0 (0.96, 1.1)                | 0.74    | 1.0 (0.95, 1.1)                 | 0.95    |
| Male gender, n (%) <sup>a)</sup>                                                                                                           | 131 (39.9)                         | 30 (47.6)                                       | 1.4 (0.80, 2.3)                | 0.26    | 1.3 (0.73, 2.2)                 | 0.38    |
| Cognitive impairment, n (%) <sup>a)</sup>                                                                                                  | 198 (60.4)                         | 43 (68.3)                                       | 1.4 (0.79, 2.5)                | 0.24    | 1.2 (0.68, 2.2)                 | 0.49    |
| Living temporarily in assisted nursing facility, n (%) <sup>a)</sup>                                                                       | 45 (13.7)                          | 9 (14.3)                                        | 1.0 (0.48, 2.3)                | 0.91    | 0.74 (0.32, 1.7)                | 0.48    |
| Clinical frailty scale, median (IQR) <sup>a)</sup>                                                                                         | 5 (5-6)                            | 6 (5-7)                                         | 2.0 (1.2, 3.3)                 | 0.01    | 2.0 (1.2, 3.5)                  | 0.01    |
| <b>B. Sensitivity analyses: Clinical characteristics by admission to permanent nursing home care in patients aged 75 and older (n=391)</b> |                                    |                                                 |                                |         |                                 |         |
|                                                                                                                                            | Continued community-living (n=451) | Admission to permanent nursing home care (n=48) | Unadjusted odds ratio (95% CI) | p-value | Adjusted odds ratio (95% CI) a) | p-value |
| Age, mean (sd) <sup>a)</sup>                                                                                                               | 83.0 (4.9)                         | 83.6 (4.7)                                      | 1.0 (0.95, 1.1)                | 0.50    | 0.99 (0.90, 1.1)                | 0.79    |
| Male gender, n (%) <sup>a)</sup>                                                                                                           | 151 (42.1)                         | 10 (31.3)                                       | 0.62 (0.29, 1.4)               | 0.24    | 0.76 (0.30, 1.9)                | 0.56    |
| Cognitive impairment, n (%) <sup>a)</sup>                                                                                                  | 217 (60.5)                         | 24 (75.0)                                       | 2.0 (0.86, 4.5)                | 0.11    | 1.8 (0.68, 4.82)                | 0.24    |
| Living temporarily in assisted nursing facility, n (%) <sup>a)</sup>                                                                       | 30 (8.4)                           | 24 (75.0)                                       | 32.9 (13.6, 79.6)              | <0.01   | 22.2 (8.6, 57.0)                | <0.01   |
| Clinical frailty scale, median (IQR) <sup>a)</sup>                                                                                         | 5 (5-6)                            | 6.5 (6-7)                                       | 6.3 (3.1, 13.0)                | <0.01   | 2.42 (1.01, 5.8)                | 0.045   |

a) Variables included in the multivariate logistic model: age (continuous variable), gender (binary variable: male vs. female), cognitive impairment (binary variable: cognitive impairment vs. no cognitive impairment, and frailty status on clinical frailty scale (ordinal three-level variable; non-frail, mild/moderate frailty, severe frailty), living temporarily in assisted living facility upon admission (binary variable: living temporarily in assisted living facility vs. living at home)
